# Supplementary material for: Development of Sensitive Anti-mouse CCR5 Monoclonal Antibodies Using the N-terminal Peptide Immunization
Source: Preprints.org preprint supplement (doi:10.20944/preprints202404.1066.v1), 2024-04-18
Supplement: Supplementary file 1 [file supplementary]

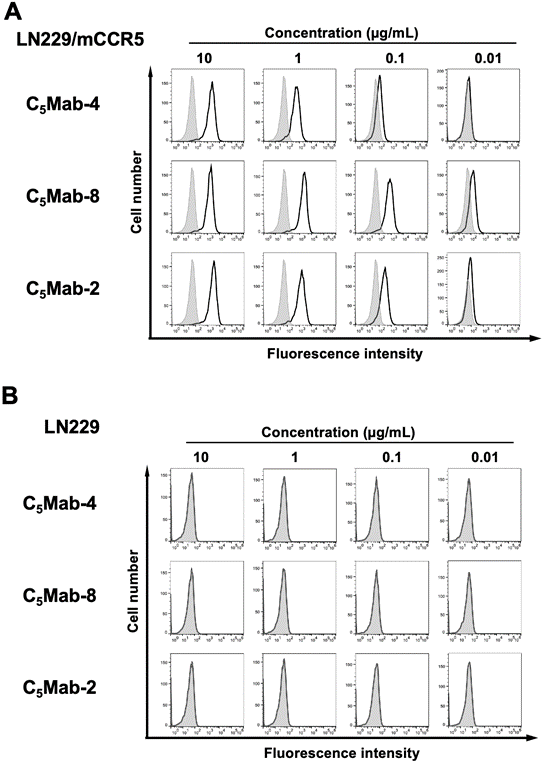


**Scheme 1.** Flow cytometry of mCCR5-overexpressed LN229 cells using anti-mCCR5 mAbs. LN229/mCCR5 (**A**) and LN229 (**B**) cells were treated with 0.01–10 µg/mL of C5Mab-4, C5Mab-8, or C5Mab-2 (black line). The mAbs-treated cells were further incubated with anti-rat IgG conjugated with Alexa Fluor 488. The filled gray represents the negative control (blocking buffer).
